# Supplementary material
Source: PubMed Central journal article supplement (PMC3982976)

# Supporting Information for “QC metrics from CPTAC raw LC-MS/MS data interpreted through multivariate statistics”

Xia Wang<sup>1</sup>, Matthew C. Chambers<sup>2</sup>, Lorenzo J. Vega-Montoto<sup>2</sup>, David M. Bunk<sup>3</sup>, Stephen E. Stein<sup>3</sup>, David L. Tabb<sup>2</sup>

1 Department of Mathematical Sciences, University of Cincinnati, Cincinnati, OH 45221

2 Vanderbilt University Medical School, Biomedical Informatics, Nashville, TN 37232-8575

3 National Institute of Standards and Technology, Gaithersburg, MD 20899

## Contents

|                                                                                                                        |    |
|------------------------------------------------------------------------------------------------------------------------|----|
| Supporting Information for “QC metrics from CPTAC raw LC-MS/MS data interpreted through multivariate statistics” ..... | 1  |
| Table S1: Study 1 instrument inclusion .....                                                                           | 2  |
| Table S2: Mass spectrometer introduction dates .....                                                                   | 3  |
| Table S3: QuaMeter IDFree metrics and execution.....                                                                   | 4  |
| Table S4: Loading matrices for factor analysis in Studies 1 and 5.....                                                 | 6  |
| Table S5: Medians and interquartile ranges (IQR) of dissimilarity measures. ....                                       | 8  |
| Table S6: ANOVA association with individual metrics.....                                                               | 9  |
| Figure S1: Additional dissimilarity values from Study 1 .....                                                          | 11 |
| Figure S2: Time points for each experiment in Study 5.....                                                             | 12 |

**Table S1: Study 1 instrument inclusion**

In Study 1 data, instruments colored blue were included in the data analysis, while instruments that employed MALDI / Peptide Mass Fingerprinting or that lacked raw data were excluded. The Waters QTOF was excluded because of problems in data export.

| <b>Instrument and Laboratory</b> | <b>Peptide Mass Fingerprinting</b> | <b>Raw available</b> | <b>Ion Source</b> |
|----------------------------------|------------------------------------|----------------------|-------------------|
| AB4700@90                        | No                                 | Yes                  | MALDI             |
| AB4800@54                        | No                                 | No                   | MALDI             |
| AB4800@96                        | No                                 | No                   | MALDI             |
| AB-Voyager@52                    | Yes                                | No                   | nanoESI           |
| AB-Voyager@54                    | Yes                                | No                   | nanoESI           |
| LTQ@73                           | No                                 | Yes                  | nanoESI           |
| LTQ@90                           | No                                 | Yes                  | nanoESI           |
| LTQ1@95                          | No                                 | Yes                  | microESI          |
| LTQ2@95                          | No                                 | Yes                  | nanoESI           |
| LTQb@65                          | No                                 | Yes                  | nanoESI           |
| Orbi@86                          | No                                 | Yes                  | nanoESI           |
| OrbiA@56                         | No                                 | Yes                  | nanoESI           |
| OrbiO@65                         | No                                 | Yes                  | nanoESI           |
| OrbiW@56                         | No                                 | Yes                  | nanoESI           |
| QSTARp@52                        | No                                 | Yes                  | nanoESI           |
| QSTARp@90                        | No                                 | Yes                  | nanoESI           |
| QSTARx@54                        | No                                 | Yes                  | nanoESI           |
| QTOFp@86                         | No                                 | Yes                  | nanoESI           |
| QTRAP@52                         | No                                 | Yes                  | nanoESI           |
| QTRAP@73                         | No                                 | Yes                  | nanoESI           |
| QTRAP@95                         | No                                 | Yes                  | nanoESI           |
| vMALDI-LTQ@52                    | No                                 | Yes                  | MALDI             |
| XCTp@90                          | No                                 | Yes                  | nanoESI           |

**Table S2: Mass spectrometer introduction dates**

The following page provides a list of mass spectrometers that were used widely in proteomics in the 1990s and the first decade of the 2000s. The instruments included in Studies 1 and 5 are included, along with older and newer instruments for context.

| <b>Vendor</b>    | <b>Model</b>       | <b>Design</b> | <b>Introduced</b> |
|------------------|--------------------|---------------|-------------------|
| Thermo           | TSQ 700            | QqQ           | Jun-90            |
| Thermo           | TSQ 7000           | QqQ           | May-94            |
| Thermo           | LCQ                | QIT           | Mar-96            |
| Waters           | QTof 1             | QqTOF         | May-96            |
| Waters           | QTof 2             | QqTOF         | Jun-96            |
| Thermo           | LCQ Deca           | QIT           | Mar-99            |
| AB SCIEX         | QSTAR Pulsar       | QqTOF         | Mar-00            |
| Waters           | QTof Ultima        | QqTOF         | Jun-00            |
| Thermo           | LCQ Deca XP        | QIT           | Mar-01            |
| Waters           | QTof Micro         | QqTOF         | Mar-01            |
| Thermo           | TSQ Quantum        | QqQ           | May-01            |
| Bruker Daltonics | ultraflex          | TOF-TOF       | Jul-01            |
| AB SCIEX         | 4700               | TOF-TOF       | Jan-02            |
| AB SCIEX         | QSTAR XL           | QqTOF         | Sep-02            |
| Bruker Daltonics | esquire HCT        | QIT           | Mar-03            |
| AB SCIEX         | 4000 Q TRAP        | QqQIT         | Jun-03            |
| Agilent          | XCT                | QIT           | Jun-03            |
| Thermo           | LTQ                | QIT           | Jun-03            |
| Thermo           | LTQ FT             | QIT-FT        | Jun-03            |
| Waters           | QTof Premier       | QqTOF         | May-04            |
| Bruker Daltonics | ultraflex II       | TOF-TOF       | Oct-04            |
| AB SCIEX         | 3200 Q TRAP        | QqQIT         | Apr-05            |
| AB SCIEX         | 4800               | TOF-TOF       | May-05            |
| Thermo           | LTQ Orbitrap       | QIT-FT        | Jun-05            |
| AB SCIEX         | QSTAR Elite        | QqTOF         | Jan-06            |
| Agilent          | 6410               | QqQ           | Jan-06            |
| Agilent          | 6510               | QqTOF         | Jan-06            |
| Waters           | Synapt             | IMS-QqTOF     | May-06            |
| Bruker Daltonics | Ultraflex III      | TOF-TOF       | Aug-06            |
| Agilent          | 6520               | QqTOF         | Jun-07            |
| Agilent          | 6530               | QqTOF         | Jun-08            |
| Bruker Daltonics | maXis              | QqTOF         | Jun-08            |
| Thermo           | TSQ Vantage        | QqQ           | Jun-08            |
| Waters           | Xevo QTof          | QqTOF         | Jan-09            |
| AB SCIEX         | 5500 Q TRAP        | QqQIT         | Mar-09            |
| AB SCIEX         | 5800               | TOF-TOF       | May-09            |
| Agilent          | 6430               | QqQ           | May-09            |
| Agilent          | 6540               | QqTOF         | May-09            |
| Bruker Daltonics | amaZon             | QIT           | May-09            |
| Bruker Daltonics | ultrafleXtreme     | TOF-TOF       | May-09            |
| Thermo           | LTQ Velos          | QIT           | May-09            |
| Thermo           | LTQ Orbitrap Velos | QIT-FT        | May-09            |
| Waters           | Synapt G2          | IMS-QqTOF     | May-09            |

### Table S3: QuaMeter IDFree metrics and execution

The following page gives a comprehensive list of the metrics produced in the “IDFree” mode of QuaMeter. The software was executed with this command line:

```
quameter.exe *.raw -MetricsType idfree -OutputFilepath metrics.tsv
```

The quameter.cfg files used for each type of instrument included the following:

#### **Orbitrap configuration:**

```
ChromatogramMzLowerOffset = "0.01mz"  
ChromatogramMzUpperOffset = "0.01mz"  
Instrument = "orbi"
```

#### **Ion Trap configuration:**

```
ChromatogramMzLowerOffset = "1.5mz"  
ChromatogramMzUpperOffset = "1.5mz"  
Instrument = "LTQ"
```

#### **QqTOF configuration:**

```
ChromatogramMzLowerOffset = "0.1mz"  
ChromatogramMzUpperOffset = "0.1mz"  
Instrument = "orbi" #Here, “Orbi” means “can resolve isotopes.”
```

|                        |                                                                             |
|------------------------|-----------------------------------------------------------------------------|
| Filename               | What is the name of the file from which the metrics were computed?          |
| StartTimeStamp         | At what time did acquisition begin for this experiment?                     |
| XIC-WideFrac           | What fraction of precursor ions account for the top half of all peak width? |
| XIC-FWHM-Q1            | What is the 25%ile of peak widths for the wide XICs?                        |
| XIC-FWHM-Q2            | What is the 50%ile of peak widths for the wide XICs?                        |
| XIC-FWHM-Q3            | What is the 75%ile of peak widths for the wide XICs?                        |
| XIC-Height-Q2          | The log ratio for 50%ile of wide XIC heights over 25%ile of heights.        |
| XIC-Height-Q3          | The log ratio for 75%ile of wide XIC heights over 50%ile of heights.        |
| XIC-Height-Q4          | The log ratio for maximum of wide XIC heights over 75%ile of heights.       |
| RT-Duration            | What is the highest scan time observed minus the lowest scan time observed? |
| RT-TIC-Q1              | The interval when the first 25% of TIC accumulates divided by RT-Duration   |
| RT-TIC-Q2              | The interval when the second 25% of TIC accumulates divided by RT-Duration  |
| RT-TIC-Q3              | The interval when the third 25% of TIC accumulates divided by RT-Duration   |
| RT-TIC-Q4              | The interval when the fourth 25% of TIC accumulates divided by RT-Duration  |
| RT-MS-Q1               | The interval for the first 25% of all MS events divided by RT-Duration      |
| RT-MS-Q2               | The interval for the second 25% of all MS events divided by RT-Duration     |
| RT-MS-Q3               | The interval for the third 25% of all MS events divided by RT-Duration      |
| RT-MS-Q4               | The interval for the fourth 25% of all MS events divided by RT-Duration     |
| RT-MSMS-Q1             | The interval for the first 25% of all MS/MS events divided by RT-Duration   |
| RT-MSMS-Q2             | The interval for the second 25% of all MS/MS events divided by RT-Duration  |
| RT-MSMS-Q3             | The interval for the third 25% of all MS/MS events divided by RT-Duration   |
| RT-MSMS-Q4             | The interval for the fourth 25% of all MS/MS events divided by RT-Duration  |
| MS1-TIC-Change-Q2      | The log ratio for 50%ile of TIC changes over 25%ile of TIC changes          |
| MS1-TIC-Change-Q3      | The log ratio for 75%ile of TIC changes over 50%ile of TIC changes          |
| MS1-TIC-Change-Q4      | The log ratio for largest TIC change over 75%ile of TIC changes             |
| MS1-TIC-Q2             | The log ratio for 50%ile of TIC over 25%ile of TIC                          |
| MS1-TIC-Q3             | The log ratio for 75%ile of TIC over 50%ile of TIC                          |
| MS1-TIC-Q4             | The log ratio for largest TIC over 75%ile TIC                               |
| MS1-Count              | How many MS scans were collected?                                           |
| MS1-Freq-Max           | What was the fastest frequency for MS collection in any minute? (Hz)        |
| MS1-Density-Q1         | What was the 25%ile of MS scan peak counts?                                 |
| MS1-Density-Q2         | What was the 50%ile of MS scan peak counts?                                 |
| MS1-Density-Q3         | What was the 75%ile of MS scan peak counts?                                 |
| MS2-Count              | How many MS/MS scans were collected?                                        |
| MS2-Freq-Max           | What was the fastest frequency for MS/MS collection in any minute? (Hz)     |
| MS2-Density-Q1         | What was the 25%ile of MS/MS scan peak counts?                              |
| MS2-Density-Q2         | What was the 50%ile of MS/MS scan peak counts?                              |
| MS2-Density-Q3         | What was the 75%ile of MS/MS scan peak counts?                              |
| MS2-PrecZ-1            | What fraction of MS/MS precursors is singly charged?                        |
| MS2-PrecZ-2            | What fraction of MS/MS precursors is doubly charged?                        |
| MS2-PrecZ-3            | What fraction of MS/MS precursors is triply charged?                        |
| MS2-PrecZ-4            | What fraction of MS/MS precursors is quadruply charged?                     |
| MS2-PrecZ-5            | What fraction of MS/MS precursors is quintuply charged?                     |
| MS2-PrecZ-more         | What fraction of MS/MS precursors is charged higher than +5?                |
| MS2-PrecZ-likely-1     | What fraction of MS/MS precursors lack known charge but look like +1s?      |
| MS2-PrecZ-likely-multi | What fraction of MS/MS precursors lack known charge but look like >+1s?     |

**Table S4: Loading matrices for factor analysis in Studies 1 and 5**

A: This table reports the loadings resulting from the Study 1 factor analysis. Sample 1A (NC120 lab digestion protocols) and Sample 1B (NCI 20 centrally digested samples) were combined for this factor analysis. The final row reports the fraction of total variability described by each factor.

|                   | Factor 1 | Factor 2 | Factor 3 | Factor 4 | Factor 5 | Factor 6 |
|-------------------|----------|----------|----------|----------|----------|----------|
| XIC.WideFrac      |          |          |          |          |          |          |
| XIC.FWHM.Q2       |          | 0.599042 |          |          |          |          |
| XIC.Height.Q2     | 0.78069  |          |          |          |          |          |
| XIC.Height.Q3     | 0.756443 |          |          |          |          |          |
| XIC.Height.Q4     | 0.779741 |          |          |          |          |          |
| RT.TIC.Q1         |          |          |          |          |          |          |
| RT.TIC.Q2         | -0.51697 |          |          |          |          |          |
| RT.TIC.Q3         | -0.62854 |          |          |          |          |          |
| RT.TIC.Q4         |          |          |          |          |          |          |
| RT.MS.Q1          |          |          |          |          |          | -0.70514 |
| RT.MS.Q2          |          |          |          |          | -0.77146 |          |
| RT.MS.Q3          |          |          |          |          |          | 0.653192 |
| RT.MS.Q4          |          |          |          |          | 0.868972 |          |
| RT.MSMS.Q1        |          |          |          |          |          | 0.720215 |
| RT.MSMS.Q2        |          |          |          | -0.59798 |          |          |
| RT.MSMS.Q3        |          |          |          | -0.56632 |          |          |
| RT.MSMS.Q4        |          |          |          | 0.70771  |          |          |
| MS1.TIC.Change.Q2 |          |          |          |          |          |          |
| MS1.TIC.Change.Q3 |          |          |          |          |          | 0.542975 |
| MS1.TIC.Change.Q4 |          |          |          | 0.615974 |          |          |
| MS1.TIC.Q2        |          |          |          |          |          |          |
| MS1.TIC.Q3        |          |          |          |          | 0.640952 |          |
| MS1.TIC.Q4        |          |          |          | 0.713715 |          |          |
| MS1.Count         |          |          |          |          |          |          |
| MS1.Freq.Max      |          |          | 0.53585  |          |          |          |
| MS1.Density.Q1    |          | 0.856041 |          |          |          |          |
| MS1.Density.Q2    |          | 0.882536 |          |          |          |          |
| MS1.Density.Q3    |          |          |          |          |          |          |
| MS2.Count         | 0.882953 |          |          |          |          |          |
| MS2.Freq.Max      | 0.922741 |          |          |          |          |          |
| MS2.Density.Q1    |          |          | 0.893332 |          |          |          |
| MS2.Density.Q2    |          |          | 0.95602  |          |          |          |
| MS2.Density.Q3    |          |          | 0.888335 |          |          |          |
| Proportion        | 0.18     | 0.106    | 0.104    | 0.088    | 0.087    | 0.08     |

B: This table reports the loadings resulting from the Study 5 factor analysis. Samples 3A (yeast) and 3B (yeast + BSA) were combined for this factor analysis.

|                   | Factor 1 | Factor 2 | Factor 3 | Factor 4 | Factor 5 | Factor 6 |
|-------------------|----------|----------|----------|----------|----------|----------|
| XIC.WideFrac      |          | 0.931    |          |          |          |          |
| XIC.FWHM.Q2       | -0.939   |          |          |          |          |          |
| XIC.Height.Q2     |          | -0.684   |          | 0.611    |          |          |
| XIC.Height.Q3     | 0.91     |          |          |          |          |          |
| XIC.Height.Q4     | -0.621   |          |          |          | 0.522    |          |
| RT.TIC.Q1         | -0.678   |          |          | -0.538   |          |          |
| RT.TIC.Q2         |          | 0.848    |          |          |          |          |
| RT.TIC.Q3         |          | 0.828    |          |          |          |          |
| RT.TIC.Q4         |          | -0.878   |          |          |          |          |
| RT.MS.Q1          |          |          | 0.93     |          |          |          |
| RT.MS.Q2          |          |          |          | 0.887    |          |          |
| RT.MS.Q3          |          |          | -0.953   |          |          |          |
| RT.MS.Q4          |          |          |          | -0.908   |          |          |
| RT.MSMS.Q1        | -0.961   |          |          |          |          |          |
| RT.MSMS.Q2        | -0.935   |          |          |          |          |          |
| RT.MSMS.Q3        | -0.925   |          |          |          |          |          |
| MS1.TIC.Change.Q2 |          |          | 0.903    |          |          |          |
| MS1.TIC.Change.Q3 | 0.638    |          |          |          |          |          |
| MS1.TIC.Change.Q4 |          |          | 0.636    |          |          |          |
| MS1.TIC.Q2        |          |          | 0.896    |          |          |          |
| MS1.TIC.Q3        | 0.913    |          |          |          |          |          |
| MS1.TIC.Q4        | 0.765    |          |          |          |          |          |
| MS1.Count         | 0.931    |          |          |          |          |          |
| MS1.Freq.Max      |          |          | 0.652    | 0.684    |          |          |
| MS1.Density.Q1    | -0.612   |          | -0.629   |          |          |          |
| MS1.Density.Q2    | -0.787   | 0.528    |          |          |          |          |
| MS1.Density.Q3    | -0.631   | 0.659    |          |          |          |          |
| MS2.Freq.Max      |          | 0.566    |          |          | 0.773    |          |
| MS2.Density.Q1    | 0.957    |          |          |          |          |          |
| MS2.Density.Q2    | 0.967    |          |          |          |          |          |
| MS2.Density.Q3    | 0.958    |          |          |          |          |          |
| Proportion        | 0.403    | 0.176    | 0.172    | 0.138    | 0.052    | 0.008    |

**Table S5: Medians and interquartile ranges (IQR) of dissimilarity measures.**

A: Medians and interquartile ranges of dissimilarity measures for Study 1 experiments, corresponding to Figure 2A and 2B in the main text.

|                                                                                                    | Sample Pairs | Median | IQR  |
|----------------------------------------------------------------------------------------------------|--------------|--------|------|
| <b>Figure 2A: Study 1 experiments from the same mass spectrometer (in the same lab)</b>            | <b>1A</b>    | 3.71   | 3.20 |
|                                                                                                    | <b>1B</b>    | 3.63   | 4.51 |
|                                                                                                    | <b>1A:1B</b> | 6.31   | 3.95 |
| <b>Figure 2B: Study 1 experiments from the same type of instruments but different laboratories</b> | <b>1A</b>    | 7.91   | 3.20 |
|                                                                                                    | <b>1B</b>    | 8.16   | 3.51 |
|                                                                                                    | <b>1A:1B</b> | 8.47   | 3.83 |

B: Medians and interquartile ranges of dissimilarity measures for Study 5 experiments, corresponding to Figure 2C and 2D in the main text. Results on QIT and Orbitrap instruments in Study 1 are also listed for comparison with Study 5, which used LTQ and Orbitrap instruments.

|                                                                         | same mass spectrometer<br>(Figure 2A and 2C) |        |      |                                                                                                    | same type of instruments but<br>different laboratories<br>(Figure 2B and 2D) |        |      |
|-------------------------------------------------------------------------|----------------------------------------------|--------|------|----------------------------------------------------------------------------------------------------|------------------------------------------------------------------------------|--------|------|
|                                                                         | Sample Pairs                                 | Median | IQR  |                                                                                                    | Sample Pairs                                                                 | Median | IQR  |
| <b>Figure 2A: Study 1 experiments from QIT and Orbitrap instruments</b> | <b>1A</b>                                    | 2.27   | 3.46 | <b>Figure 2B: Study 1 experiments from QIT and Orbitrap instruments</b>                            | <b>1A</b>                                                                    | 8.22   | 3.46 |
|                                                                         | <b>1B</b>                                    | 2.23   | 3.50 |                                                                                                    | <b>1B</b>                                                                    | 7.75   | 3.38 |
|                                                                         | <b>1A:1B</b>                                 | 4.99   | 2.74 |                                                                                                    | <b>1A:1B</b>                                                                 | 8.35   | 3.77 |
| <b>Figure 2C: Study 5 experiments from the same mass spectrometer</b>   | <b>3A</b>                                    | 1.86   | 1.61 | <b>Figure 2D: Study 5 experiments from the same type of instruments but different laboratories</b> | <b>3A</b>                                                                    | 7.36   | 1.62 |
|                                                                         | <b>3B</b>                                    | 1.78   | 1.15 |                                                                                                    | <b>3B</b>                                                                    | 7.47   | 2.20 |



**Table S6: ANOVA association with individual metrics**

The Bonferroni method adjusted the p-values for multiple hypotheses testing. An “X” in a given cell indicates the corresponding factors (Mass Spectrometer or Batch) had a significant impact on the variability of the given metric.

| QuaMeter Metrics  | Study 1 Sample 1B |              | Study 5 Sample 3A |              | Study 5 Sample 3B |              |
|-------------------|-------------------|--------------|-------------------|--------------|-------------------|--------------|
|                   | Mass Spectrometer | Nested Batch | Mass Spectrometer | Nested Batch | Mass Spectrometer | Nested Batch |
| XIC.WideFrac      |                   | X            | X                 | X            | X                 |              |
| XIC.FWHM.Q2       |                   | X            | X                 | X            | X                 |              |
| XIC.Height.Q2     |                   | X            | X                 |              | X                 |              |
| XIC.Height.Q3     |                   | X            | X                 |              | X                 |              |
| XIC.Height.Q4     | X                 |              | X                 |              | X                 |              |
| RT.TIC.Q1         | X                 | X            | X                 |              |                   |              |
| RT.TIC.Q2         |                   | X            |                   |              |                   |              |
| RT.TIC.Q3         |                   | X            |                   | X            |                   | X            |
| RT.TIC.Q4         |                   | X            |                   |              |                   |              |
| RT.MS.Q1          | X                 |              | X                 |              |                   |              |
| RT.MS.Q2          | X                 |              |                   |              | X                 |              |
| RT.MS.Q3          |                   |              |                   |              | X                 |              |
| RT.MS.Q4          | X                 |              |                   |              | X                 |              |
| RT.MSMS.Q1        |                   |              | X                 |              |                   |              |
| RT.MSMS.Q2        |                   |              | X                 | X            |                   |              |
| RT.MSMS.Q3        |                   | X            | X                 | X            |                   |              |
| RT.MSMS.Q4        |                   |              |                   |              |                   |              |
| MS1.TIC.Change.Q2 | X                 |              | X                 | X            | X                 |              |
| MS1.TIC.Change.Q3 |                   | X            |                   |              | X                 |              |
| MS1.TIC.Change.Q4 |                   | X            | -----             | -----        | -----             | -----        |
| MS1.TIC.Q2        |                   |              | X                 |              | X                 |              |
| MS1.TIC.Q3        |                   | X            | X                 |              | X                 |              |
| MS1.TIC.Q4        | X                 |              | X                 |              |                   |              |
| MS1.Count         | X                 | X            | X                 |              | X                 |              |
| MS1.Freq.Max      |                   |              | X                 |              | X                 | X            |
| MS1.Density.Q1    | X                 | X            |                   | X            | X                 |              |
| MS1.Density.Q2    |                   | X            | X                 | X            | X                 |              |
| MS1.Density.Q3    |                   | X            | X                 | X            | X                 |              |
| MS2.Count         | X                 | X            | -----             | -----        | -----             | -----        |
| MS2.Freq.Max      | X                 | X            | X                 |              | X                 |              |
| MS2.Density.Q1    | X                 | X            | X                 | X            | X                 |              |
| MS2.Density.Q2    | X                 | X            | X                 | X            | X                 | X            |
| MS2.Density.Q3    | X                 | X            | X                 | X            | X                 |              |

We examined how the individual metrics were affected by the mass spectrometer and batch factors. The nested ANOVA model was evaluated on each of the metrics, separately. For Study 1, 14 of 33 metrics were significantly affected by the mass spectrometer factor, and 22 were significantly affected by the nested batch factor after controlling for multiple comparisons by the Bonferroni method. For Study 5, there are 22 metrics significantly affected by the mass spectrometer effects and 12 metrics significantly affected by the batch effects for sample 3A and 24 and 3 for sample 3B. This table summarizes the ANOVA results for each metric in Study 1 and Study 5. It shows that there are more metrics that are significantly affected by nested batch factor in Study 1 than in Study 5. The possible reason is that the SOP reduced the variability of metrics related to experimental run orders. In Study 5, the major source of variability in the experimental performance was from the mass spectrometer effects, thus a larger proportion of metrics were significantly affected by the mass spectrometer factor. Also, some metrics were consistently affected by one or two factors in both studies. For example, the changes in mass spectrometer led to significant variation in XIC.Height.Q4, MS1.TIC.Change.Q2, MS1.Count, MS2.Freq.Max and MS2.Density.Qx. The batch has a significant impact on RT.TIC.Q3 and MS2.Density.Q2 in both studies. On the other hand, other metrics were only significant in one study (e.g. RT.TIC.Q2).

**Figure S1: Additional dissimilarity values from Study 1**

A: The following chart gives the distribution of dissimilarity values for instruments of different types in the same laboratory. Sample 1A: NC1-20 mixture digested by lab digestion protocols; Sample 1B: NCI-20 mixture centrally digested.

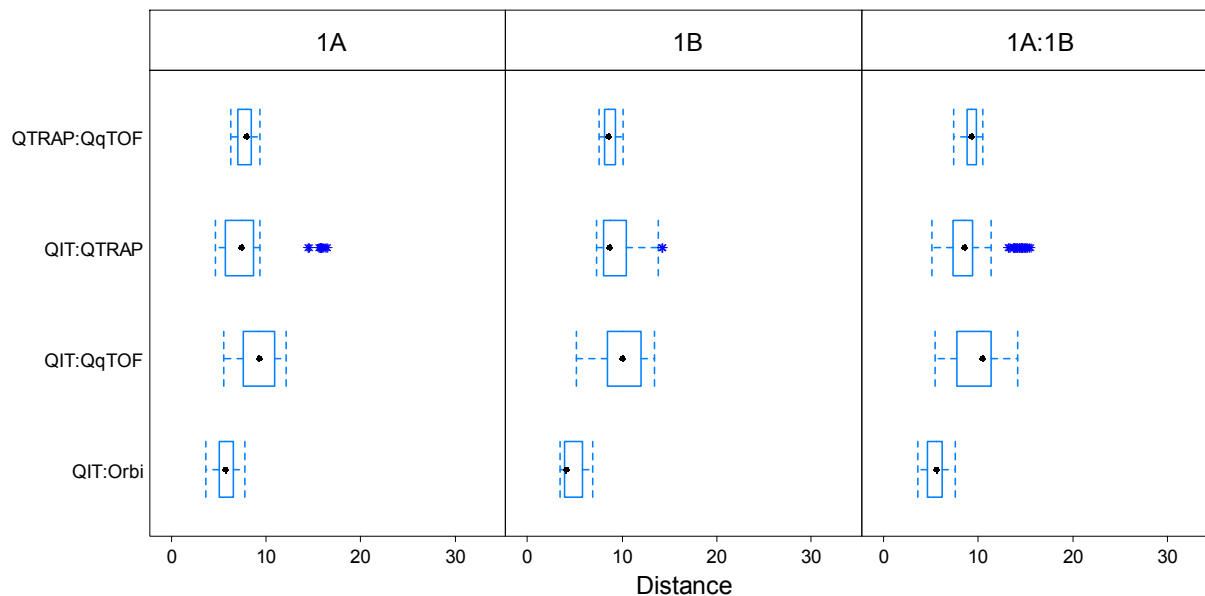

B: The following chart gives the distribution of dissimilarity values for instruments of different types and laboratories, representing a worst-case scenario for similarity. Sample 1A: NC1-20 mixture digested by lab digestion protocols; Sample 1B: NCI-20 mixture centrally digested.

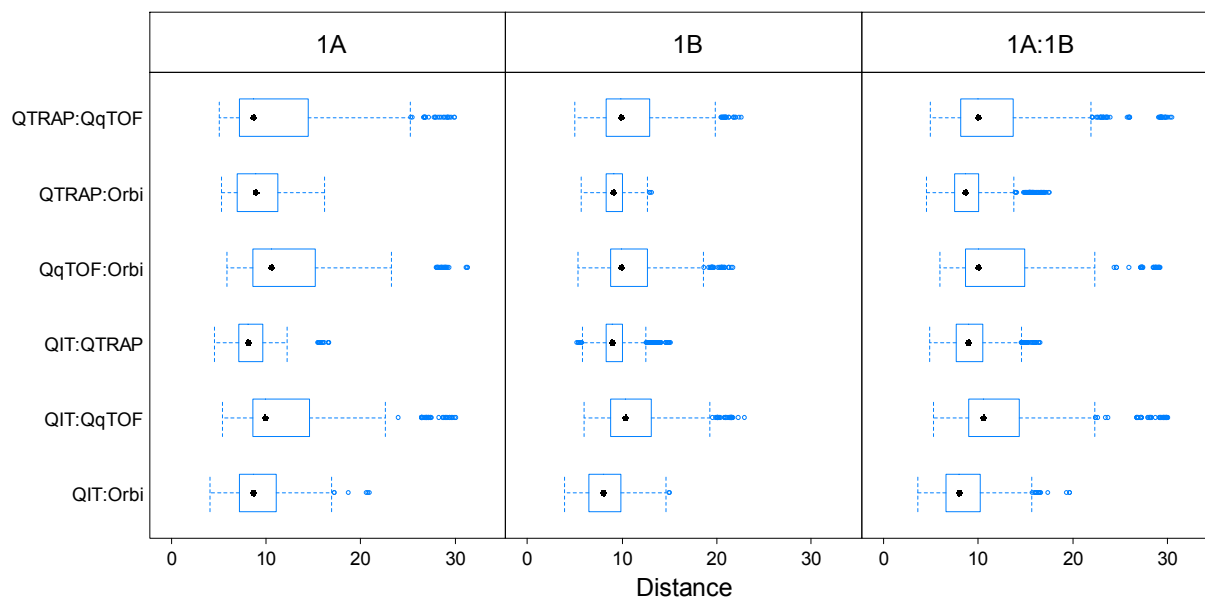

Figure S2: Time points for each experiment in Study 5

The following chart illustrates the run times for each LC-MS/MS experiment in the course of Study 5 across six instruments. Run order was prescribed by the SOP under which Study 5 was conducted. Sample 1B: digested NCI-20 mixture; Samples 3A: yeast; 3B: yeast + BSA.

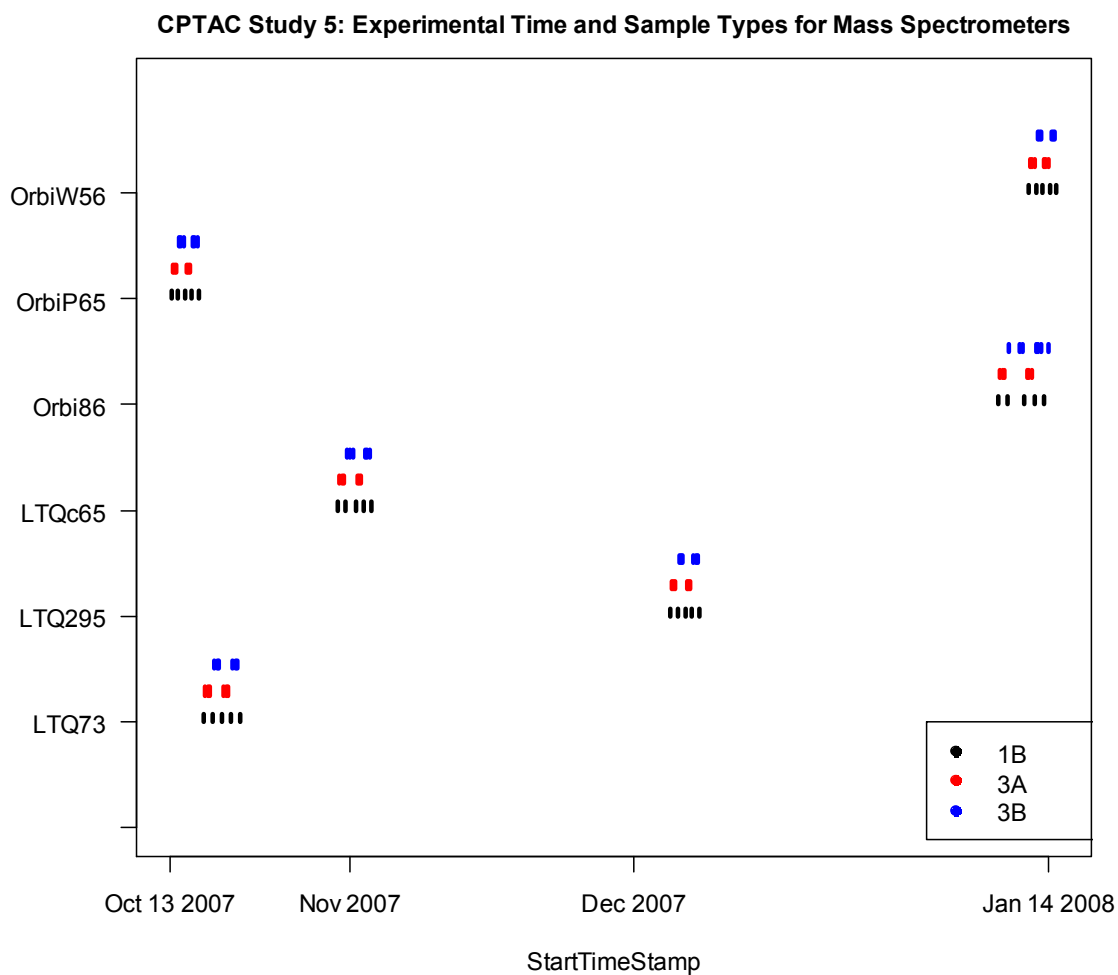

Supplement: ac4034455_si_001.pdf [file ac4034455_si_001.pdf]
